# Supplementary material for: Decreased TSPAN1 promotes prostate cancer progression and is a marker for early biochemical recurrence after radical prostatectomy
Source: PubMed Central journal article supplement (PMC5325364; doi:10.18632/oncotarget.11448), 2016-08-20
Supplement: oncotarget-07-63294-s001.pdf [file oncotarget-07-63294-s001.pdf]

## Decreased TSPAN1 promotes prostate cancer progression and is a marker for early biochemical recurrence after radical prostatectomy

### Supplementary Materials

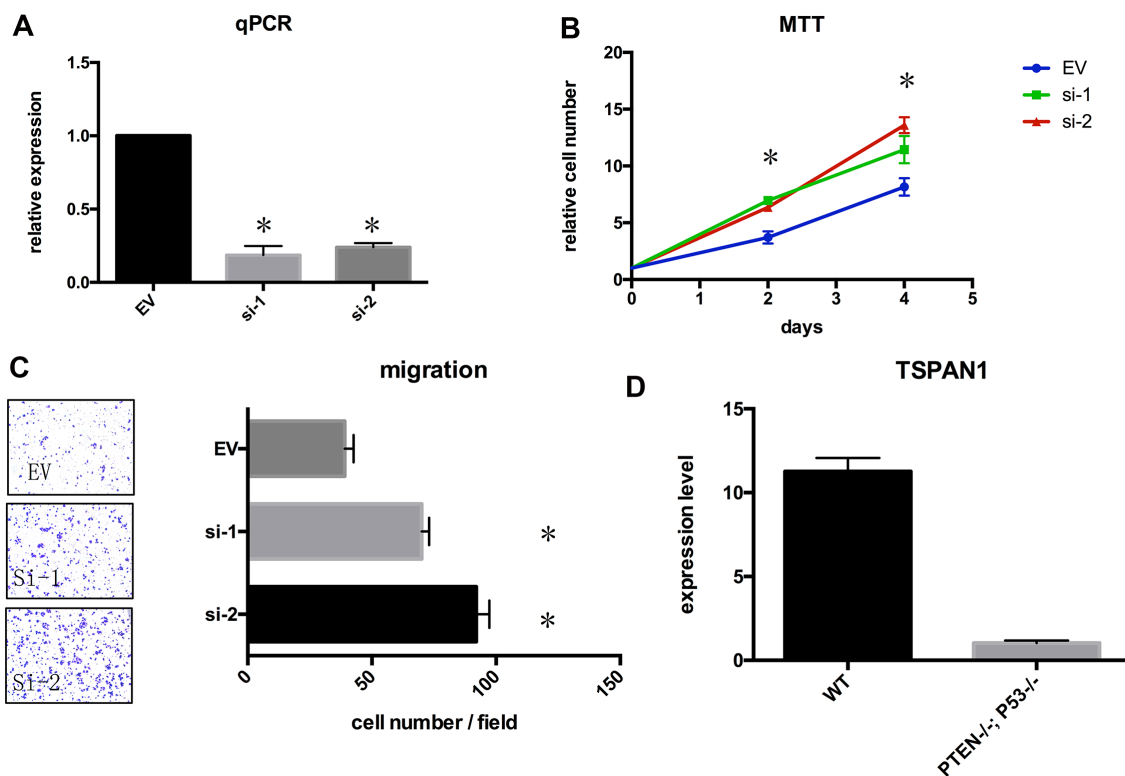

**Supplementary Figure S1:** (A) TSPAN1 knockdown in PC3 cells was checked by qPCR test. (B) MTT assay of TSPAN1 knockdown in PC3 cells. (C) Migration assay of TSPAN1 knockdown in PC3 cells. (D) qPCR analysis of TSPAN1 expression in WT and PTEN<sup>-/-</sup>; P53<sup>-/-</sup> mouse.
